# Supplementary material for: Modeling of the Small-Scale Outbreak of COVID-19
Source: Frontiers journal article supplement (doi:10.3389/fpubh.2022.907814), 2022-07-01
Supplement: Image_1.pdf [file Image_1.pdf]

## *Supplementary Material*

### Supplementary Figure

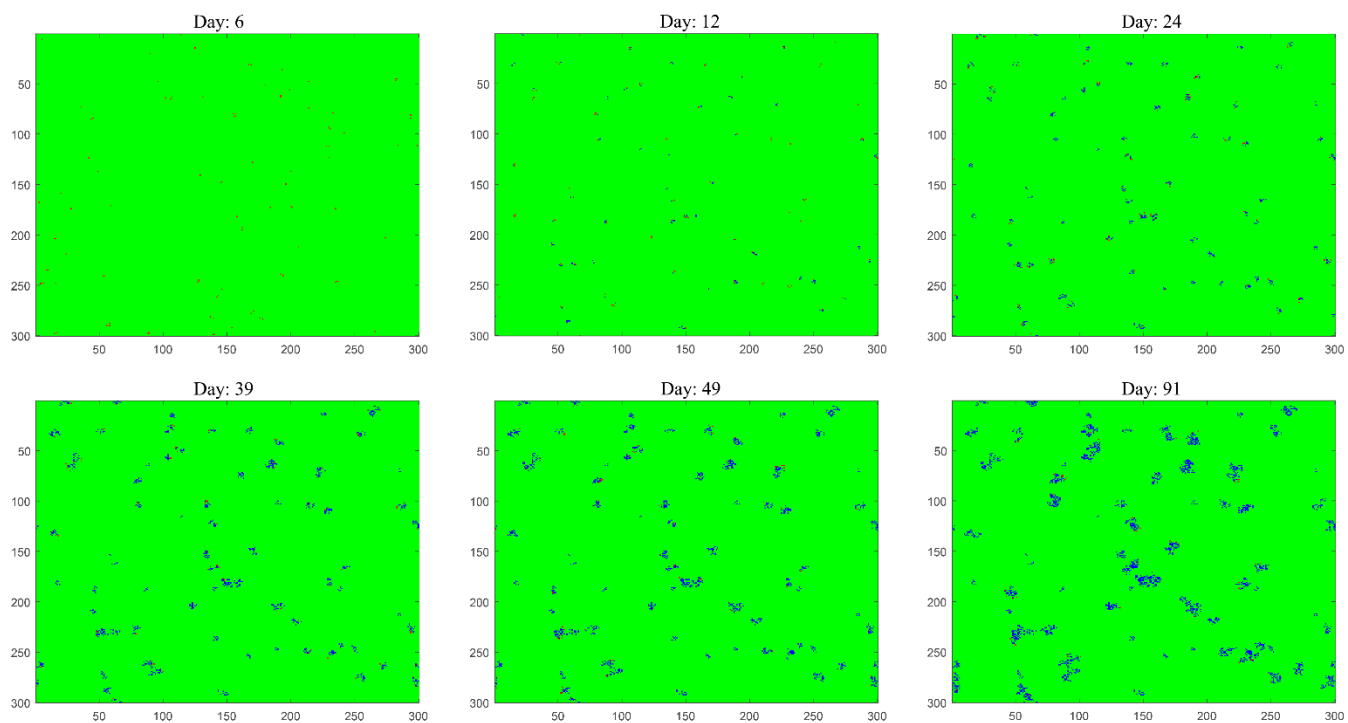

**Figure S1.** The simulation results of the proposed CA during the outbreak of COVID-19 in Heilongjiang province (January 2021).
